# Supplementary material
Source: publisher figshare collection journal article supplement (https://acs.figshare.com/ndownloader/files/22177794)
Supplement: Supplementary file 1 [file 22177794]

## Supporting Information

### Shape Control of Multivalent 3D Colloidal Particles via Interference Lithography

Ji-Hyun Jang, Chaitanya K. Ullal, Steve Kooi, CheongYang Koh, and Edwin L. Thomas\*

*Institute for Soldier Nanotechnologies, Department of Materials Science and Engineering,  
Massachusetts Institute of Technology, Cambridge, Massachusetts 02139(USA)*

Contact information;

Tel: 617-253-5931

Fax: 617-253-5859

E-mail: [elt@mit.edu](mailto:elt@mit.edu)

**Laser setup:** 2D and 3D patterns were fabricated using multi-beam holographic interference lithography that allows generation of periodic structures over large areas with high resolution. The fabrication involved the sequential, double exposure to the interference pattern of two equal intensity laser beams for the 2D square lattice and single exposure to the interference pattern of six equal intensity laser beams for simple cubic 3D structure and the transfer of the resultant intensity pattern into an SU8 photoresist platform via laser-initiated cationic polymerization. The Gaussian output from the laser was cleaned up and expanded using a spatial filter and re-collimation setup: the beam was expanded by a factor of  $\sim 2$  for the 2D square lattice; a set of bi-convex lenses with focal lengths of 80mm and 171mm were used to expand the beam by a factor of  $\sim 2$  for the 3D simple cubic structure. The light intensity distribution depends on the relative directions and polarizations of the interfering beams. For the case of the 2D square structure, a 2-step sequential exposure with a  $90^\circ$  rotation of the sample on a rotation stage between exposures was used where orthogonal sets of gratings were exposed onto the resist. A light coupling prism was not utilized for the fabrication and corrections in the k-vectors and beam polarizations were accounted for in the

modeling of the level sets of the interference patterns. For the 3D simple cubic structure, prisms with an index equal to that of the photoresist with faces perpendicular to the incoming beams were employed to prevent refraction of the incident beams. The beam geometry and the prism configuration used are shown in Figure S1.

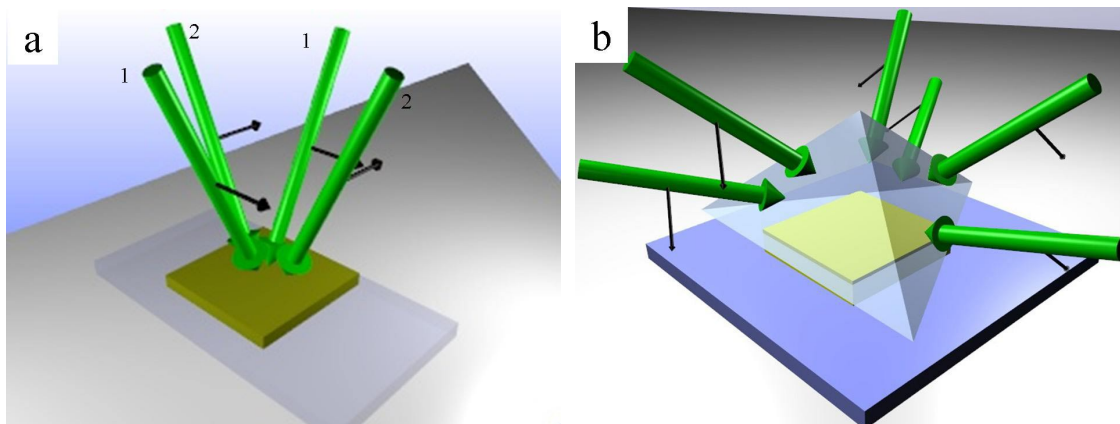

Figure S1. Schematic illustration showing the beam geometry and the prism configuration for double exposure of the 2D square structure (a) and for the single exposure of the 3D simple cubic structure.

**Preparation of 2D and 3D bicontinuous structure:** The materials platform consisted of Epon-SU8 (Shell) as a photoresist (a multifunctional epoxy derivative of a bisphenol-A Novolac), H-Nu 470 (Spectra group) as a photosensitizer which absorbs the visible light and electron transfers to an onium salt, octoxyphenylphenyliodonium hexafluoroantimonate (OPPI) (UCB Radcure) as a photoacid generator, and trioctylamine to compensate the non-zero background arising from the interference intensity. The glass support was treated with a thin (700 nm) buffer layer of pre-crosslinked SU8 material to assure firm attachment of the structured polymer film to the substrate via chemical grafting. An 8  $\mu\text{m}$  thick SU-8 film was spin-coated on top of the existing SU-8 film at a spin speed of 1000 rpm. The exposures for 2D and 3D were done using a 532 nm

Nd:YAG laser with an intensity of 1.5 W for 5-10 seconds to give a total exposure dose of 8-15 J/cm<sup>2</sup>. After baking the 8µm-thick film at 65 °C for 5 min, the resultant cationic photopolymerization only takes place in regions that were exposed to high intensities of light. The uncured regions were developed away in PGMEA (propyleneglycol monomethylether acetate) followed by CO<sub>2</sub> supercritical drying to yield the 2D and 3D porous photopatterned structures.

**Preparation of 2D and 3D polymer particles:** Exposures were done using a 532 nm Nd:YAG laser with a varied intensity of 1.3-1.4 W for 4-8 seconds to give a total exposure dose of 6-11 J/cm<sup>2</sup>. After baking the 0.8 µm-thick film for the square and 4µm-thick film for the P structure at 65 °C for 5 min, the uncured regions were developed away first in PGMEA (propyleneglycol monomethylether acetate) and secondly in NMP (N-Methyl-2-Pyrrolidone). The film was finally rinsed with isopropyl alcohol followed by CO<sub>2</sub> supercritical drying to yield the lightly connected 3D polymer particles. NMP, known for its exceptional solvent power and relatively low toxicity, is readily biodegradable and can be used as substitute for methylene chloride safely and effectively in the electronic industry applications such as a photoresist stripper.

**UV/ozonolysis:** The ozone used was produced by a LG-7, Ozone Generator (Ozone Engineering). In this apparatus, ozone is generated by a high voltage discharge between ceramic and metal electrodes. Oxygen is flowed into the corona discharge gap. The output of the ozone generator was fed into a glass horizontal tube containing the samples to be exposed. In conjunction with ozonolysis, irradiation was performed by using a UV lamp



exposures. Figures 2a and 2d in the manuscript are the isointensity surfaces obtained from the level-set approach for the square and simple cubic lattice, while figures 2b-c and 2e-f show isotropic etching till pinch off for the respective structures obtained. These two sets of figures may be compared to demonstrate that the simply lowering the intensity will cause significant loss of the concave multi-valency of the particles.

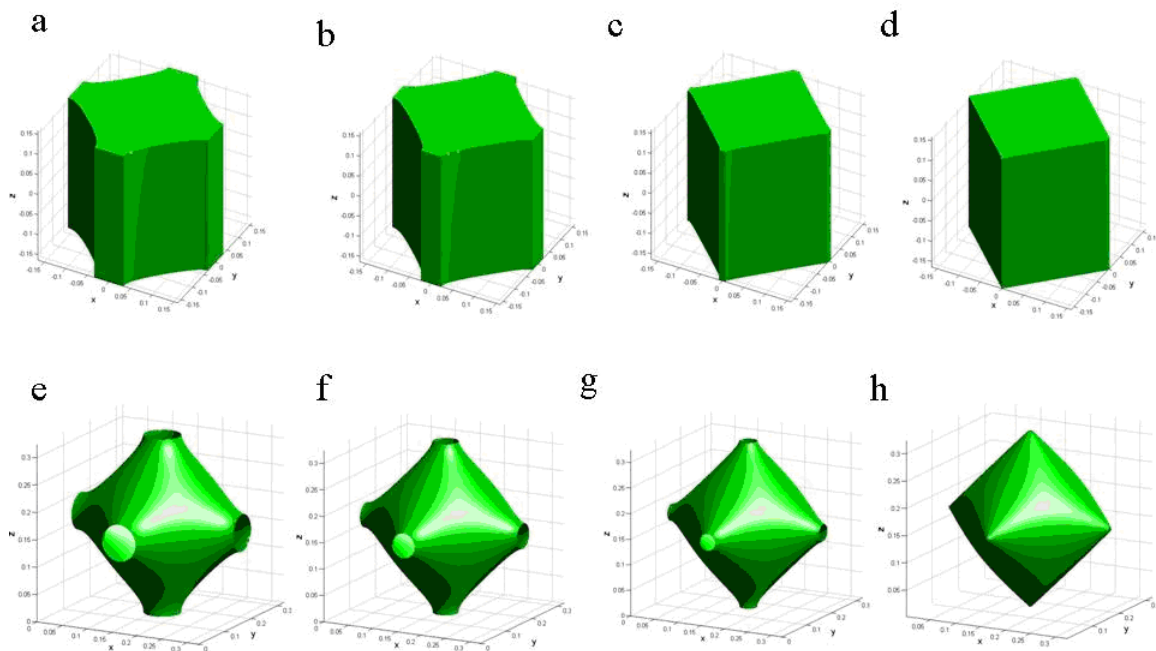

Figure S2. The theoretical model of single unit cell for the truncated rectangular prism structure (a, b, c, d) and for the simple cubic structure (e, f, g, h) at various volume fractions. Simply decreasing volume fractions along iso-intensities of the parent structure results in a loss of the distinct “valency” in the final particles.

Various volume fractions of 2D square lattices (S3a, S3b, S3c) were obtained by decreasing the light intensity and normal development in PGMEA.

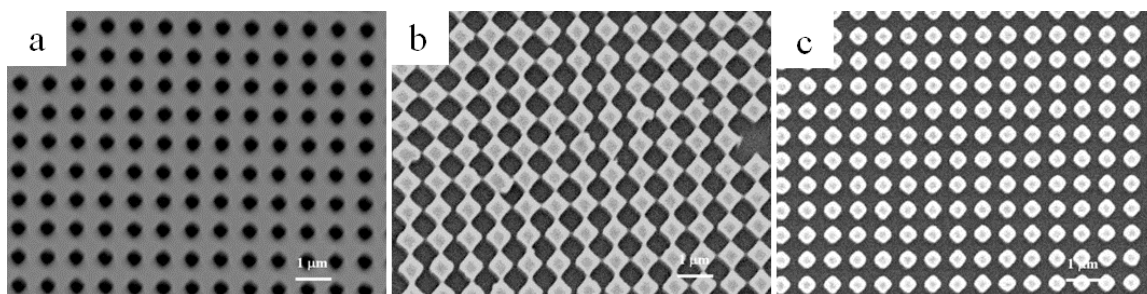

Figure S3. The experimental SEM images of 2D square lattice at different volume fractions with (a) 100%, (b) 60%, and (c) 40% of normal light intensity showing losing the distinct “valency” in the final particles.

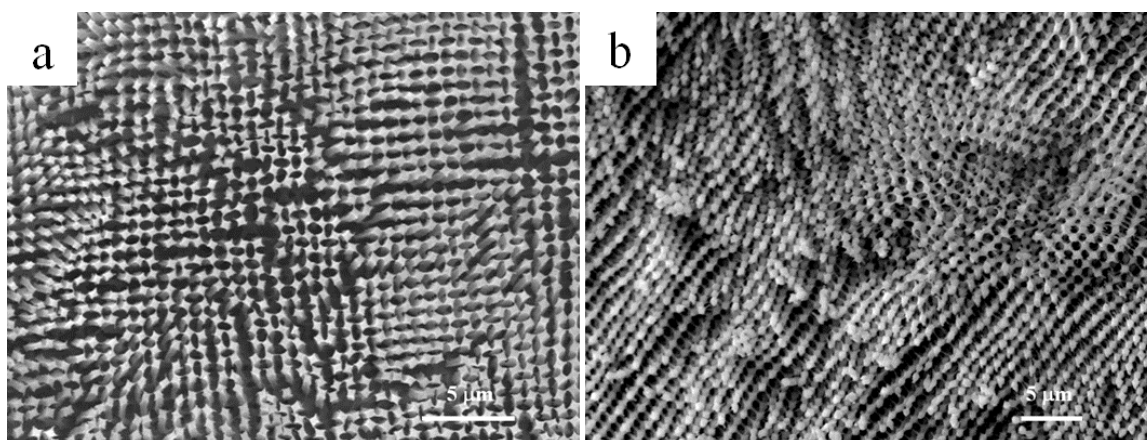

Figure S4. The large area SEM images of 2D square (a) and simple P structure (b) before pinch off by strong wet development in NMP followed by CO<sub>2</sub> supercritical drying.
